# Supplementary material for: Dietary Problems Are Associated with Frailty Status in Older People with Fewer Teeth in Japan
Source: MDPI journal article supplement (doi:10.3390/ijerph192316260), 2022-12-05
Supplement: s1 [file s1]

**Supplement Table S1.** Characteristics of non-frailty and frailty participants

|                                                          | All<br>participants<br>n = 160 | Non-frailty<br>n = 117 | Frailty<br>n = 43 | P-value <sup>a</sup> |
|----------------------------------------------------------|--------------------------------|------------------------|-------------------|----------------------|
| Age (median (25%–75%))                                   | 82 (79–86)                     | 81 (78–86)             | 84 (80–87)        | <0.019 <sup>c</sup>  |
| Female                                                   | 72.5%                          | 70.1%                  | 79.1%             | 0.259 <sup>b</sup>   |
| Education                                                |                                |                        |                   |                      |
| ≤ 9 years                                                | 50.0%                          | 47.0%                  | 58.1%             |                      |
| 10–12 years                                              | 33.1%                          | 35.0%                  | 27.9%             | 0.376 <sup>b</sup>   |
| ≥ 13 years                                               | 16.9%                          | 17.9%                  | 14.0%             |                      |
| Single/never married                                     | 54.4%                          | 51.3%                  | 62.8%             | 0.195 <sup>b</sup>   |
| Living alone                                             | 29.4%                          | 29.9%                  | 27.9%             | 0.804 <sup>b</sup>   |
| Care situation                                           |                                |                        |                   |                      |
| Independent                                              | 66.2%                          | 75.2%                  | 41.9%             |                      |
| Requiring assistance                                     | 13.8%                          | 7.7%                   | 30.2%             | <0.001 <sup>b</sup>  |
| Requiring long-term care                                 | 20.0%                          | 17.1%                  | 27.9%             |                      |
| No ability to fill out forms by<br>oneself               | 39.4%                          | 30.8%                  | 62.8%             | <0.001 <sup>b</sup>  |
| Smoking                                                  |                                |                        |                   |                      |
| Never                                                    | 80.0%                          | 80.3%                  | 79.1%             |                      |
| Past                                                     | 15.0%                          | 13.7%                  | 18.6%             | 0.245 <sup>b</sup>   |
| Current                                                  | 5.0%                           | 6.0%                   | 2.3%              |                      |
| High alcohol consumption (≥ 3<br>cups of drinks per day) | 5.0%                           | 5.1%                   | 4.7%              | 0.902 <sup>b</sup>   |
| Cognitive decline <sup>d</sup>                           | 18.4%                          | 16.8%                  | 30.0%             | 0.051 <sup>b</sup>   |
| Medicine (≥ 3 per day)                                   | 74.4%                          | 67.5%                  | 93.0%             | 0.001 <sup>b</sup>   |
| CCI (median (25%–75%))                                   | 0 (0–1)                        | 0 (0–1)                | 1 (0–1)           | <0.001 <sup>c</sup>  |

<sup>a</sup> Difference between the non-frailty and frailty group<sup>b</sup> P for the chi-square test<sup>c</sup> P for the Wilcoxon signed-rank test<sup>d</sup> Excluding participants with missing value (n =8)

CCI, Charlson comorbidity index

**Supplement Table S2.** Distributions of SOF index between the  $\geq 20$  teeth and  $< 20$  teeth group

|                             | All participants<br>n = 160 | $\geq 20$ teeth<br>n = 63 | $< 20$ teeth<br>n = 97 | P-value <sup>a</sup> |
|-----------------------------|-----------------------------|---------------------------|------------------------|----------------------|
| SOF index (Number of items) |                             |                           |                        |                      |
| 0                           | 38.1%                       | 30.2%                     | 18.6%                  | 0.057 <sup>b</sup>   |
| 1                           | 82.5%                       | 54.0%                     | 47.4%                  |                      |
| 2                           | 38.1%                       | 14.3%                     | 28.9%                  |                      |
| 3                           | 6.2%                        | 1.6%                      | 5.2%                   |                      |

<sup>a</sup> Difference between the  $\geq 20$  teeth and  $< 20$  teeth group

<sup>b</sup> P for chi-square test

**Supplement Table S3.** Proportions of denture use between the  $\geq 20$  teeth and  $< 20$  teeth group

|                   | All participants<br>n = 160 | $\geq 20$ teeth<br>n = 63 | $< 20$ teeth<br>n = 97 | P-value <sup>a</sup> |
|-------------------|-----------------------------|---------------------------|------------------------|----------------------|
| Denture use       |                             |                           |                        |                      |
| Upper denture use | 59.4%                       | 17.5%                     | 86.6%                  | $< 0.001^b$          |
| Lower denture use | 58.1%                       | 25.4%                     | 77.3%                  | $< 0.001^b$          |

<sup>a</sup> Difference between the  $\geq 20$  teeth and  $< 20$  teeth group

<sup>b</sup> P for chi-square test
